# Supplementary material
Source: HighWire-hosted journal article supplement (https://fn.bmj.com/content/108/3/302)

**Supplemental material**

*S1 Figure 1. Head circumference measured in the first six months after birth (n = 51 infants) and birth weight (n = 54 infants) displayed as standard deviations compared to the general population*

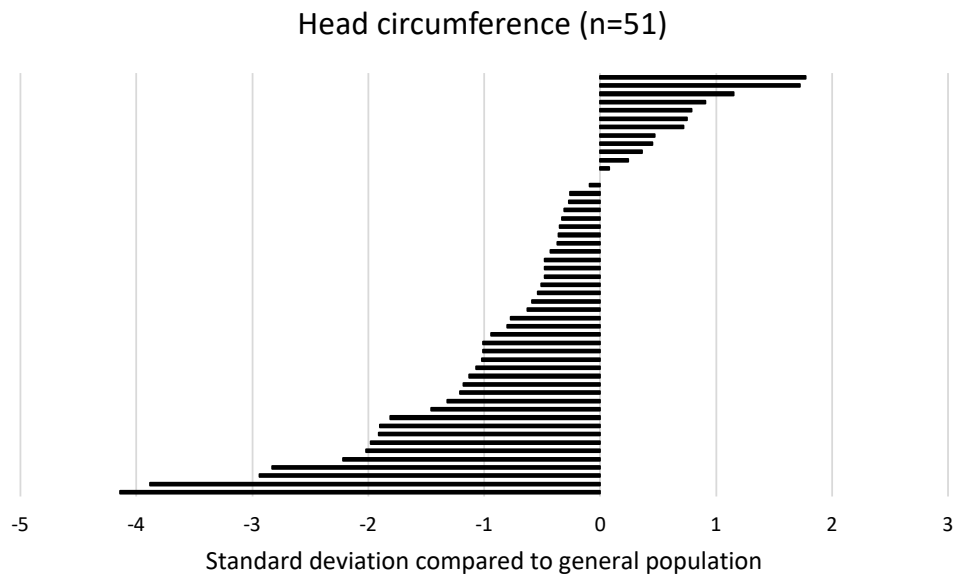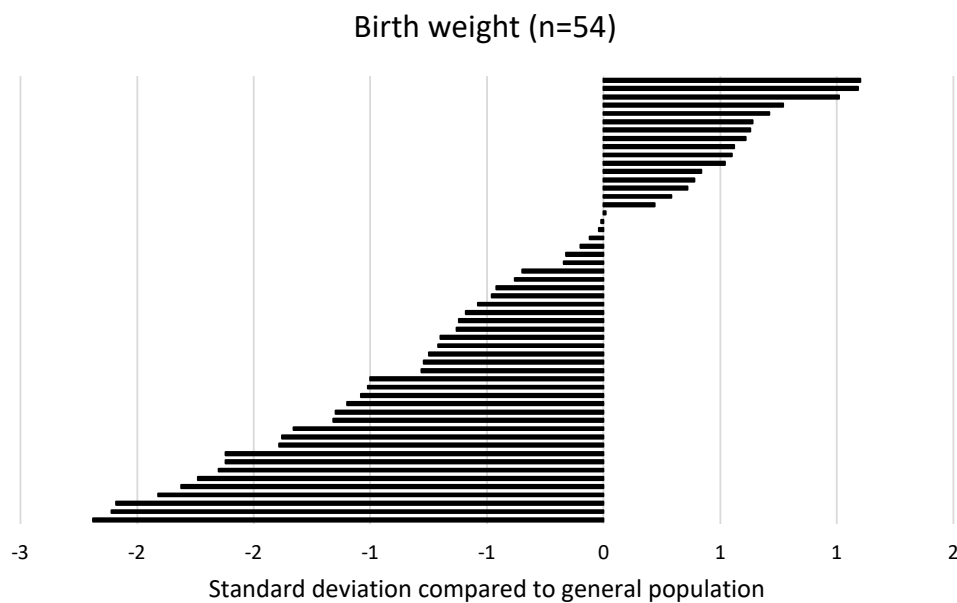

Supplement: inline-supplementary-material-1 [file inline-supplementary-material-1.pdf]
